# Supplementary material
Source: publisher site journal article supplement (http://www.degruyter.com/publication/journal_key/ANONA/downloadAsset/ANONA_Article%20Processing%20Charges.pdf)
Supplement: Supplementary file 1 [file ANONA_Article%20Processing%20Charges.pdf]

## Article Processing Charges

EFFECTIVE MARCH 2022

---

In order to sustain the production of our fully-refereed open access journal, each article accepted for publication in *Advances in Nonlinear Analysis* is subject to an Article Processing Charge of **€1200**. This fee is used to cover the costs of the peer-review process, professional typesetting and copyediting, as well as online hosting, long-term preservation, distribution to libraries and content aggregators worldwide, and extensive promotion to potential readers. There is no submission fee.

**Editors and reviewers are not involved in author payment process and do not discuss charges with authors.** The ability to pay does not influence whether or not a manuscript is accepted for publication.

Information regarding payment of these charges will be provided following acceptance for publication. Inquiries concerning Article Processing Charges should be addressed to the Editorial Office ([ewa.sarzynska@degruyter.com](mailto:ewa.sarzynska@degruyter.com)).

Articles Processing Charges are collected via **RightsLink** system (provided by Copyright Clearance Center). The payment can be made in EUR, USD or GBP, and may be subject to VAT when applicable.

### Waiver Policies

If the submitting author is affiliated with an organization which has [an open access agreement](#) with De Gruyter, the article processing charges (APCs) may be covered or discounted. Moreover, all authors can apply for a discount or a waiver during the submission process. Authors are asked to contact the Managing Editor ([ewa.sarzynska@degruyter.com](mailto:ewa.sarzynska@degruyter.com)) before, or straight after submitting their article.

### Funding Opportunities

Authors who are looking for funds to support the payment of Article Processing Charges have a number of options to consider. For details, visit [our website](#).

#### Editorial Office

Ewa Sarzyńska  
Managing Editor  
De Gruyter Poland Ltd.  
Bogumiła Zuga 32A  
01-811 Warsaw / Poland  
Tel: +48 22 701 50 15  
Email: [ewa.sarzynska@degruyter.com](mailto:ewa.sarzynska@degruyter.com)
